# Supplementary material for: Biological Significance of Marine Actinobacteria of East Coast of Andhra Pradesh, India
Source: PubMed Central journal article supplement (PMC5498559; doi:10.3389/fmicb.2017.01201), 2017-07-06
Supplement: DataSheet1.pdf [file DataSheet1.pdf]

**Supplementary Table.** Volatile compound analysis by Gas Chromatography Mass Spectra (GCMS).

| S.No.                           | Actinobacterial strains | GCMS products                   | Retention time |                                 |        |
|---------------------------------|-------------------------|---------------------------------|----------------|---------------------------------|--------|
| 1.                              | A1                      | 1,8-Nonadien-3-ol               | 10.827         |                                 |        |
|                                 |                         | 1-Hexanol, 2-ethyl-             | 11.923         |                                 |        |
|                                 |                         | 6-Hydroxymethyl-5-methyl-bicycl | 13.529         |                                 |        |
|                                 |                         | 1,8-Nonadien-3-ol               | 14.231         |                                 |        |
|                                 |                         | Tin, dichlorodimethyl-          | 14.929         |                                 |        |
|                                 |                         | Acetic acid, 2-ethylhexyl ester | 15.708         |                                 |        |
|                                 |                         | DL-Serine, N-[(phenylmethoxy)ca | 16.372         |                                 |        |
|                                 |                         | 1H-Indene, 1-methylene-         | 16.629         |                                 |        |
|                                 |                         | 2-Piperidinone                  | 18.462         |                                 |        |
|                                 |                         | DL-Leucine, N-glycyl-           | 19.031         |                                 |        |
|                                 |                         | Caprolactam                     | 19.416         |                                 |        |
|                                 |                         | 2-Trifluoroacetoxydodecane      | 19.571         |                                 |        |
|                                 |                         | Bicyclo[4.4.1]undeca-1,3,5,7,9- | 19.879         |                                 |        |
|                                 |                         | Tetradecane                     | 20.007         |                                 |        |
|                                 |                         | Benzoic acid, 2-methylpropyl es | 20.881         |                                 |        |
|                                 |                         | 2(3H)-Naphthalenone, 4,4a,5,6,7 | 21.288         |                                 |        |
|                                 |                         | Chloroacetic acid, 2-ethylhexyl | 21.694         |                                 |        |
|                                 |                         | 9-Methyltricyclo[4.2.1.1(2,5)   | 21.994         |                                 |        |
|                                 |                         | Biphenyl                        | 22.204         |                                 |        |
|                                 |                         | Benzenepropanoic acid, dodecyl  | 22.525         |                                 |        |
|                                 |                         | 2-Ethylhexyl mercaptoacetate    | 23.621         |                                 |        |
|                                 |                         | Tetradecane, 2,6,10-trimethyl-  | 24.285         |                                 |        |
|                                 |                         | tert-Hexadecanethiol            | 24.803         |                                 |        |
|                                 |                         | 8-Heptadecene, 9-octyl-         | 25.009         |                                 |        |
|                                 |                         | 1,2-Benzenedicarboxylic acid, d | 47.617         |                                 |        |
|                                 |                         | 2.                              | A2             | 1,8-Nonadien-3-ol               | 12.659 |
|                                 |                         |                                 |                | Phenylethyl Alcohol             | 13.177 |
|                                 |                         |                                 |                | Tin, dichlorodimethyl-          | 13.588 |
|                                 |                         |                                 |                | Acetic acid, 2-ethylhexyl ester | 14.034 |
|                                 |                         |                                 |                | Glutaconic acid                 | 14.261 |
|                                 |                         |                                 |                | Bicyclo[4.4.1]undeca-1,3,5,7,9- | 18.050 |
|                                 |                         |                                 |                | d-Mannose                       | 18.380 |
| 1,4-Dioxaspiro[4.5]decane-7-m   | 18.504                  |                                 |                |                                 |        |
| E-2-Hexenyl benzoate            | 18.997                  |                                 |                |                                 |        |
| Trichloroacetic acid, 2-ethylhe | 19.780                  |                                 |                |                                 |        |
| Octadecane, 6-methyl-           | 20.752                  |                                 |                |                                 |        |
| 2-Ethylhexyl mercaptoacetate    | 21.669                  |                                 |                |                                 |        |
| Tetradecane, 2,6,10-trimethyl-  | 22.324                  |                                 |                |                                 |        |
| tert-Hexadecanethiol            | 22.846                  |                                 |                |                                 |        |
| 8-Heptadecene, 9-octyl-         | 23.039                  |                                 |                |                                 |        |
| Butylated Hydroxytoluene        | 23.677                  |                                 |                |                                 |        |
| 2,5-Octadecadiynoic acid, met   | 24.268                  |                                 |                |                                 |        |
| Falcarinol                      | 25.415                  |                                 |                |                                 |        |
| Methyl 5,7-hexadecadiynoate     | 26.464                  |                                 |                |                                 |        |
| Propanoic acid, 2-methyl-, (dec | 27.976                  |                                 |                |                                 |        |
| 1H-2,8a-Methanocyclopenta[a]cyc | 28.567                  |                                 |                |                                 |        |
| 1,2-Benzenedicarboxylic acid,   | 45.609                  |                                 |                |                                 |        |
| 3.                              | A3                      |                                 |                | 1,8-Nonadien-3-ol               | 12.638 |
|                                 |                         | Acetic acid, 2-ethylhexyl ester | 14.030         |                                 |        |
|                                 |                         | Tin, dichlorodimethyl-          | 14.154         |                                 |        |

|    |    |                                  |        |
|----|----|----------------------------------|--------|
|    |    | 2-Piperidinone, 1-methyl-        | 14.261 |
|    |    | 11-Oxa-dispiro[4.0.4.1]undecan-  | 17.729 |
|    |    | Benzeneacetic acid, 4-tetradecy  | 18.127 |
|    |    | Propanedioic acid, phenyl-       | 18.273 |
|    |    | Nonanoic acid                    | 18.273 |
|    |    | 1-Propanol, 3-(phenylmethoxy)-   | 19.001 |
|    |    | Benzenepropanoic acid, pentadec  | 19.793 |
|    |    | Benzenepropanoic acid            | 20.435 |
|    |    | Benzenepropanoic acid, tridecyl  | 20.748 |
|    |    | 2-Ethylhexyl mercaptoacetate     | 21.669 |
|    |    | Tetradecane, 2,6,10-trimethyl-   | 22.320 |
|    |    | 1-Dodecanol, 3,7,11-trimethyl-   | 22.846 |
|    |    | 8-Heptadecene, 9-octyl-          | 23.035 |
|    |    | tert-Hexadecanethiol             | 23.236 |
|    |    | 4,6-di-tert-Butyl-m-cresol       | 23.677 |
|    |    | 11,13-Dihydroxy-tetradec-5-ynoi  | 25.415 |
|    |    | Methyl 5,7-hexadecadiynoate      | 26.379 |
|    |    | 10,13-Octadecadiynoic acid, met  | 26.683 |
|    |    | Doconexent                       | 27.141 |
|    |    | 2-Propenoic acid, oxybis(methyl  | 27.813 |
|    |    | Cinnamic acid, 4-hydroxy-3-meth  | 30.190 |
|    |    | 1,2-Benzenedicarboxylic acid,    | 31.911 |
|    |    | 1,2-Benzenedicarboxylic acid, b  | 32.832 |
|    |    | 1,2-Benzenedicarboxylic acid, d  | 45.571 |
| 4. | A4 | 1-Hexanol, 2-ethyl-              | 10.642 |
|    |    | 6-Hydroxymethyl-5-methyl-bicycl  | 12.064 |
|    |    | Nonanal                          | 12.689 |
|    |    | Tin, dichlorodimethyl            | 13.340 |
|    |    | Acetic acid, 2-ethylhexyl ester  | 14.034 |
|    |    | 4-[Dichloromethyl]-2-[[2-[1-m    | 14.034 |
|    |    | 3-Trifluoroacetoxydodecane       | 17.691 |
|    |    | Bicyclo[4.4.1]undeca-1,3,5,7,9-  | 18.037 |
|    |    | Benzeneacetic acid, 2-tetradecy  | 18.123 |
|    |    | Benzoic acid, 2-methylpropyl es  | 18.992 |
|    |    | 2(3H)-Naphthalenone, 4,4a,5,6,7  | 19.570 |
|    |    | Chloroacetic acid, 2-ethylhexyl  | 19.780 |
|    |    | 3-Phenyl-propionic acid, isopro  | 20.285 |
|    |    | Tetradecane, 2,6,10-trimethyl-   | 20.744 |
|    |    | 2-Ethylhexyl mercaptoacetate     | 21.681 |
|    |    | tert-Hexadecanethiol             | 22.850 |
|    |    | 8-Heptadecene, 9-octyl-          | 23.043 |
|    |    | 4,6-di-tert-Butyl-m-cresol       | 23.681 |
|    |    | 2,5-Octadecadiynoic acid, methyl | 24.135 |
|    |    | Methyl 5,7-hexadecadiynoate      | 24.281 |
|    |    | Falcarinol                       | 25.432 |
|    |    | 1,2-Benzenedicarboxylic acid,    | 33.221 |
|    |    | 1,2-Benzenedicarboxylic acid,    | 45.746 |
| 5. | A5 | 1,8-Nonadien-3-ol                | 10.647 |
|    |    | w-Isonitrosoacetophenone         | 11.623 |
|    |    | 4-[Dichloromethyl]-2-[[2-[1-met  | 12.068 |
|    |    | Nonanal                          | 12.698 |
|    |    | Tin, dichlorodimethyl-           | 13.147 |
|    |    | Acetic acid, 2-ethylhexyl ester  | 14.034 |
|    |    | 1H-Indene, 1-methylene-          | 14.950 |
|    |    | 2-Piperidinone                   | 17.151 |
|    |    | Bicyclo[4.4.1]undeca-1,3,5,7,9-  | 18.046 |

|    |    |                                      |                |
|----|----|--------------------------------------|----------------|
|    |    | Octadecane, 6-methyl-                | 18.127         |
|    |    | Benzeneacetic acid                   | 18.765         |
|    |    | 1-Propanol, 3-(phenylmethoxy)-       | 18.765         |
|    |    | 2(3H)-Naphthalenone, 4,4a,5,6,7      | 19.562         |
|    |    | Benzeneacetic acid, 4-tetradecy      | 19.780         |
|    |    | 2-Ethylhexyl mercaptoacetate         | 21.699         |
|    |    | Tetradecane, 2,6,10-trimethyl-       | 22.328         |
|    |    | tert-Hexadecanethiol                 | 22.850         |
|    |    | 8-Heptadecene, 9-octyl-              | 23.047         |
|    |    | 4,6-di-tert-Butyl-m-cresol           | 23.681         |
|    |    | [5,9-Dimethyl-1-(3-phenyl-oxira      | 24.126         |
|    |    | 5-Benzofuranacetic acid, 6-ethe      | 25.278         |
|    |    | 2-[4-methyl-6-(2,6,6-trimethylc      | 25.432         |
|    |    | 1,2-Benzenedicarboxylic acid, b      | 33.256         |
|    |    | 1,2-Benzenedicarboxylic acid,        | 45.703         |
| 6. | A6 | 1-Hexanol, 2-ethyl-                  | 10.638         |
|    |    | Nonanal                              | 12.694         |
|    |    | Acetic acid, 2-ethylhexyl ester      | 14.034         |
|    |    | Tertbutyloxyformamide, N-methyl      | 14.291         |
|    |    | N-Methyl-9-aza-tricyclo[6.2.2.0      | 14.950         |
|    |    | 2-Piperidinone                       | 16.205         |
|    |    | Benzoic acid, 2-methylpropyl es      | 19.001         |
|    |    | Chloroacetic acid, 2-ethylhexyl      | 19.789         |
|    |    | Benzenepropanoic acid, pentadec      | 20.915         |
|    |    | 2-Ethylhexyl mercaptoacetate         | 21.707         |
|    |    | Geranyl isovalerate                  | 22.332         |
|    |    | tert-Hexadecanethiol                 | 23.047         |
|    |    | 4,6-di-tert-Butyl-m-cresol           | 23.690         |
|    |    | [5,9-Dimethyl-1-(3-phenyl-oxi        | 24.144         |
|    |    | Methyl 5,7-hexadecadiynoate          | 24.884         |
|    |    | Hexa-t-butylselenatrisiletane        | 45.905         |
| 7. | A7 | 6-Ethyl-3-(1-methylethyl)tetra       | 21.018         |
|    |    | 1,8-Nonadien-3-ol                    | 22.251         |
|    |    | 1-Dodecanol                          | 22.675         |
|    |    | Trichloroacetic acid, tridecyl       | 22.983         |
|    |    | Nonadecane                           | 23.184         |
|    |    | 3-Trifluoroacetoxypentadecane        | 23.570         |
|    |    | Phenol, 2,4-bis(1,1-dimethyleth      | 23.733         |
|    |    | Hexanoic acid, 4-tridecyl ester      | 24.178         |
|    |    | trans-2-undecenoic acid              | 24.709         |
|    |    | Hexadecane                           | 25.535         |
|    |    | Tetradecane, 2,6,10-trimethyl-       | 26.828         |
|    |    | p-Octylacetophenone                  | 26.987         |
|    |    | 1-Hexadecanol, 2-methyl-             | 27.770         |
|    |    | 2-Propenoic acid, oxybis(methyl      | 27.775         |
|    |    | Octadecane, 1-chloro-                | 27.899         |
|    |    | Pyrrolo[1,2-a]pyrazine-1,4-dion      | 31.462, 42.286 |
|    |    | 1,2-Benzenedicarboxylic acid         | 31.564         |
|    |    | a-D-Xylofuranose, cyclic 1,2:3,      | 34.155         |
|    |    | 2,5-di-tert-Butyl-1,4-benzoquin      | 34.626         |
|    |    | 9-Octadecenethioic acid, 12-hyd      | 34.789         |
|    |    | 17-Pentatriacontene                  | 38.231         |
|    |    | 1,9-Dioxacyclohexadeca-4,13-d        | 39.529         |
|    |    | Ergotaman-3',6',18-trione, 9,10      | 41.528         |
|    |    | Octadecane, 3-ethyl-5-(2-ethylbutyl) | 45.721         |

|    |    |                                 |                |
|----|----|---------------------------------|----------------|
| 8. | A8 | Tetradecane, 5-methyl-          | 22.251         |
|    |    | 1-Dodecanol                     | 22.688         |
|    |    | Trichloroacetic acid, tridecyl  | 22.974         |
|    |    | Nonadecane                      | 23.180         |
|    |    | 4-Trifluoroacetoxypentadecane   | 25.372         |
|    |    | Hexadecane                      | 25.535         |
|    |    | Tetradecane, 2,6,10-trimethyl-  | 26.640         |
|    |    | 2-Propenoic acid, oxybis(methyl | 27.719         |
|    |    | Pyrrolo[1,2-a]pyrazine-1,4-dion | 30.742, 31.294 |
|    |    | 1,2-Benzenedicarboxylic acid, b | 31.521         |
|    |    | Z-5-Methyl-6-heneicosen-11-one  | 38.467         |
|    |    | Hexanedioic acid, dioctyl ester | 42.393         |
|    |    | Octadecane, 3-ethyl-5-(2-ethylb | 45.703         |

---
